# Supplementary material for: Fifteen‐Year Trends in Incidence of Cardiogenic Shock Hospitalization and In‐Hospital Mortality in the United States
Source: PubMed Central journal article supplement — J Am Heart Assoc. 2021 Jul 28;10(15):e021061. doi: 10.1161/JAHA.121.021061 (PMC8475696; doi:10.1161/jaha.121.021061), 2021-07-28
Supplement: JAH3-10-e021061-s001.pdf [file JAH3-10-e021061-s001.pdf]

# **Supplemental Material**

**Table S1. International classification of disease codes used in the current analysis.**

| <b>Disease/Treatment</b>                     | <b>ICD-9 codes</b>                                                                                                                                                    | <b>ICD-10 codes</b>                                                                                                                                                                                                                                                                                                                                                                                                                                                                                                                                                                                                                                                                                                                                                                                                                                                                                                                                                                             |
|----------------------------------------------|-----------------------------------------------------------------------------------------------------------------------------------------------------------------------|-------------------------------------------------------------------------------------------------------------------------------------------------------------------------------------------------------------------------------------------------------------------------------------------------------------------------------------------------------------------------------------------------------------------------------------------------------------------------------------------------------------------------------------------------------------------------------------------------------------------------------------------------------------------------------------------------------------------------------------------------------------------------------------------------------------------------------------------------------------------------------------------------------------------------------------------------------------------------------------------------|
| Acute myocardial infarction                  | 410.00, 410.01, 410.10, 410.11, 410.20, 410.21, 410.30, 410.31, 410.40, 410.41, 410.50, 410.51, 410.60, 410.61, 410.80, 410.81, 410.90, 410.91, 410.70, 410.71, 411.1 | I21.01, I21.02, I21.09, I21.11 I21.19, I21.21, I21.29, I21.3, I22.0, I22.1, I22.2, I22.8, I22.9, I21.4, I22.2                                                                                                                                                                                                                                                                                                                                                                                                                                                                                                                                                                                                                                                                                                                                                                                                                                                                                   |
| Percutaneous coronary intervention           | 00.66, 36.01, 36.02, 36.05, 36.06, 36.07, 17.55                                                                                                                       | 0270346, 027034Z, 02703D6, 02703DZ, 02703Z6, 02703ZZ, 0270446, 027044Z, 02704D6, 02704DZ                                                                                                                                                                                                                                                                                                                                                                                                                                                                                                                                                                                                                                                                                                                                                                                                                                                                                                        |
| Coronary artery bypass grafting              | 3610, 3611, 3612, 3613, 3614, 3615, 3616, 3617, 3619                                                                                                                  | 02130KW, 02130Z3, 02130Z8, 02130Z9, 02130ZC, 02130ZF, 02130K8, 02130K9, 02130KC, 02130KF, 02130A9, 02130AC, 02130AF, 02130AW 02130J3, 02130J8 02130J9, 02130JC 02130JF, 02130JW 02130K3, 02120Z8, 02120Z9, 02120ZC, 02120ZF, 0213093, 0213098, 0213099, 021309C, 021309F, 021309W, 02130A3, 02130A8, 02120AW, 02120J3, 02120J8, 02120J9, 02120JC, 02120JF, 02120JW, 02120K3, 02120K8 02120K9, 02120KC 02120KF, 02120KW, 02120Z3, 02110Z9, 02110ZC, 02110ZF 0212093, 0212098, 0212099, 021209C, 021209F, 021209W, 02120A3, 02120A8, 02120A9, 02120AC 02120AF, 02110J3, 02110J8, 02110J9, 02110JC, 02110JF, 02110JW, 02110K3, 02110K8, 02110K9, 02110KC, 02110KF, 02110KW, 02110Z3, 02110Z8, 02100ZC 02100ZF 0211093 0211098, 0211099, 021109C, 021109F, 021109W, 02110A3, 02110A8, 02110A9, 02110AC, 02110AF, 02110AW, 02100J3, 02100K9, 02100KC, 02100KF, 02100KW, 02100Z3, 02100Z8, 02100Z9, 0210093, 0210099, 021009C, 021009F, 021009W, 02100A3, 02100A8, 02100A9, 02100AC, 02100AF, 02100AW |
| Percutaneous left ventricular assist devices | 3768                                                                                                                                                                  | 5A0221D5A0211D, 02HA3RJ, 02HA4RJ, 5A02116, 5A02216, 02HA3QZ, 02HA3RS, 02HA3RZ, 02HA4QZ, 02HA4RJ, 02HA4RS, 02HA4RZ                                                                                                                                                                                                                                                                                                                                                                                                                                                                                                                                                                                                                                                                                                                                                                                                                                                                               |
| Extracorporeal membrane oxygenation          | 3965                                                                                                                                                                  | 5A1522F, 5A1522G, 5A15A2F, 5A15A2G, 5A1523                                                                                                                                                                                                                                                                                                                                                                                                                                                                                                                                                                                                                                                                                                                                                                                                                                                                                                                                                      |
| Intra-aortic balloon pump                    | 3761                                                                                                                                                                  | 5A02210                                                                                                                                                                                                                                                                                                                                                                                                                                                                                                                                                                                                                                                                                                                                                                                                                                                                                                                                                                                         |
| Durable left ventricular assist devices      | 3766 & 3752                                                                                                                                                           | 02HA0QZ                                                                                                                                                                                                                                                                                                                                                                                                                                                                                                                                                                                                                                                                                                                                                                                                                                                                                                                                                                                         |
| Renal replacement therapy                    | 3995                                                                                                                                                                  | 5A1D70Z, 5A1D80Z, 5A1D90Z, 5A1D60Z, 5A1D00Z                                                                                                                                                                                                                                                                                                                                                                                                                                                                                                                                                                                                                                                                                                                                                                                                                                                                                                                                                     |
| Mechanical ventilation                       | 9762                                                                                                                                                                  | 5A1935Z, 5A1945Z, 5A1955Z                                                                                                                                                                                                                                                                                                                                                                                                                                                                                                                                                                                                                                                                                                                                                                                                                                                                                                                                                                       |

**Table S2. Treatment strategies across the different eras.**

| Treatment                      | Pre-PLVAD era<br>(2004-2007) | PLVAD era<br>(2008-2014) | Shock team era<br>(2015-2018) | P value |
|--------------------------------|------------------------------|--------------------------|-------------------------------|---------|
| <b>AMI-CS</b>                  |                              |                          |                               |         |
| Revascularization              | 64%                          | 75%                      | 69%                           | <0.01   |
| Mechanical Circulatory Support |                              |                          |                               |         |
| IABP                           | 49%                          | 50%                      | 33%                           | <0.01   |
| PLVAD                          | 0.1%                         | 3%                       | 10%                           | <0.01   |
| ECMO                           | 0.15                         | 1%                       | 2%                            | <0.01   |
| LVAD                           | 0.5%                         | 0.6%                     | 0.4%                          | <0.01   |
| Mechanical Ventilation         | 14%                          | 16%                      | 42%                           | <0.01   |
| Renal Replacement Therapy      | 3%                           | 4%                       | 7%                            | <0.01   |
| <b>Non-AMI-CS</b>              |                              |                          |                               |         |
| Mechanical Circulatory Support |                              |                          |                               |         |
| IABP                           | 19%                          | 15%                      | 6%                            | <0.01   |
| PLVAD                          | 0.1%                         | 1%                       | 2%                            | <0.01   |
| ECMO                           | 0.2%                         | 1%                       | 2%                            | <0.01   |
| LVAD                           | 0.9%                         | 1.9%                     | 2.4%                          | <0.01   |
| Mechanical Ventilation         | 19%                          | 20%                      | 42%                           | <0.01   |
| Renal Replacement Therapy      | 9%                           | 12%                      | 13%                           | <0.01   |

IABP; Intra-aortic balloon pump, PLVAD; Percutaneous left ventricular support devices [Tandem heart & Impella heart pump], ECMO; Extracorporeal membrane oxygenation, LVAD; Durable left ventricular support devices.

**Figure S1. Trend in in-hospital mortality during the study period stratified by hospital bed size.**

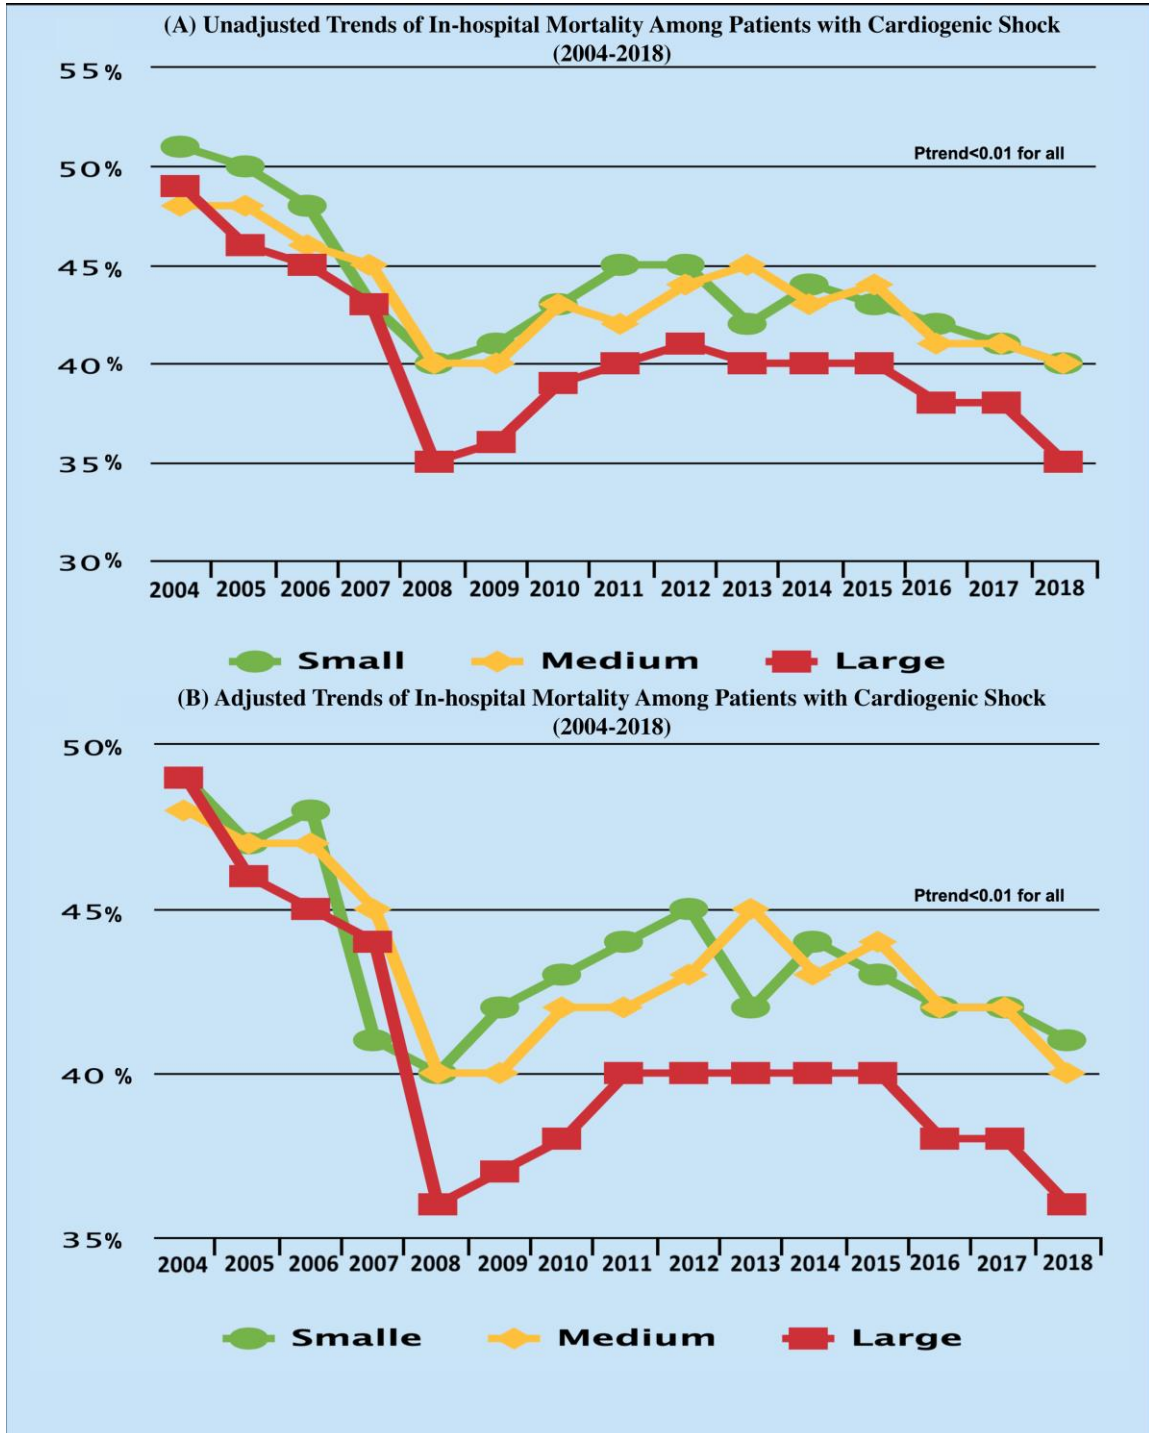

**Figure S2. Trend in in-hospital mortality during the study period stratified by hospital teaching status.**

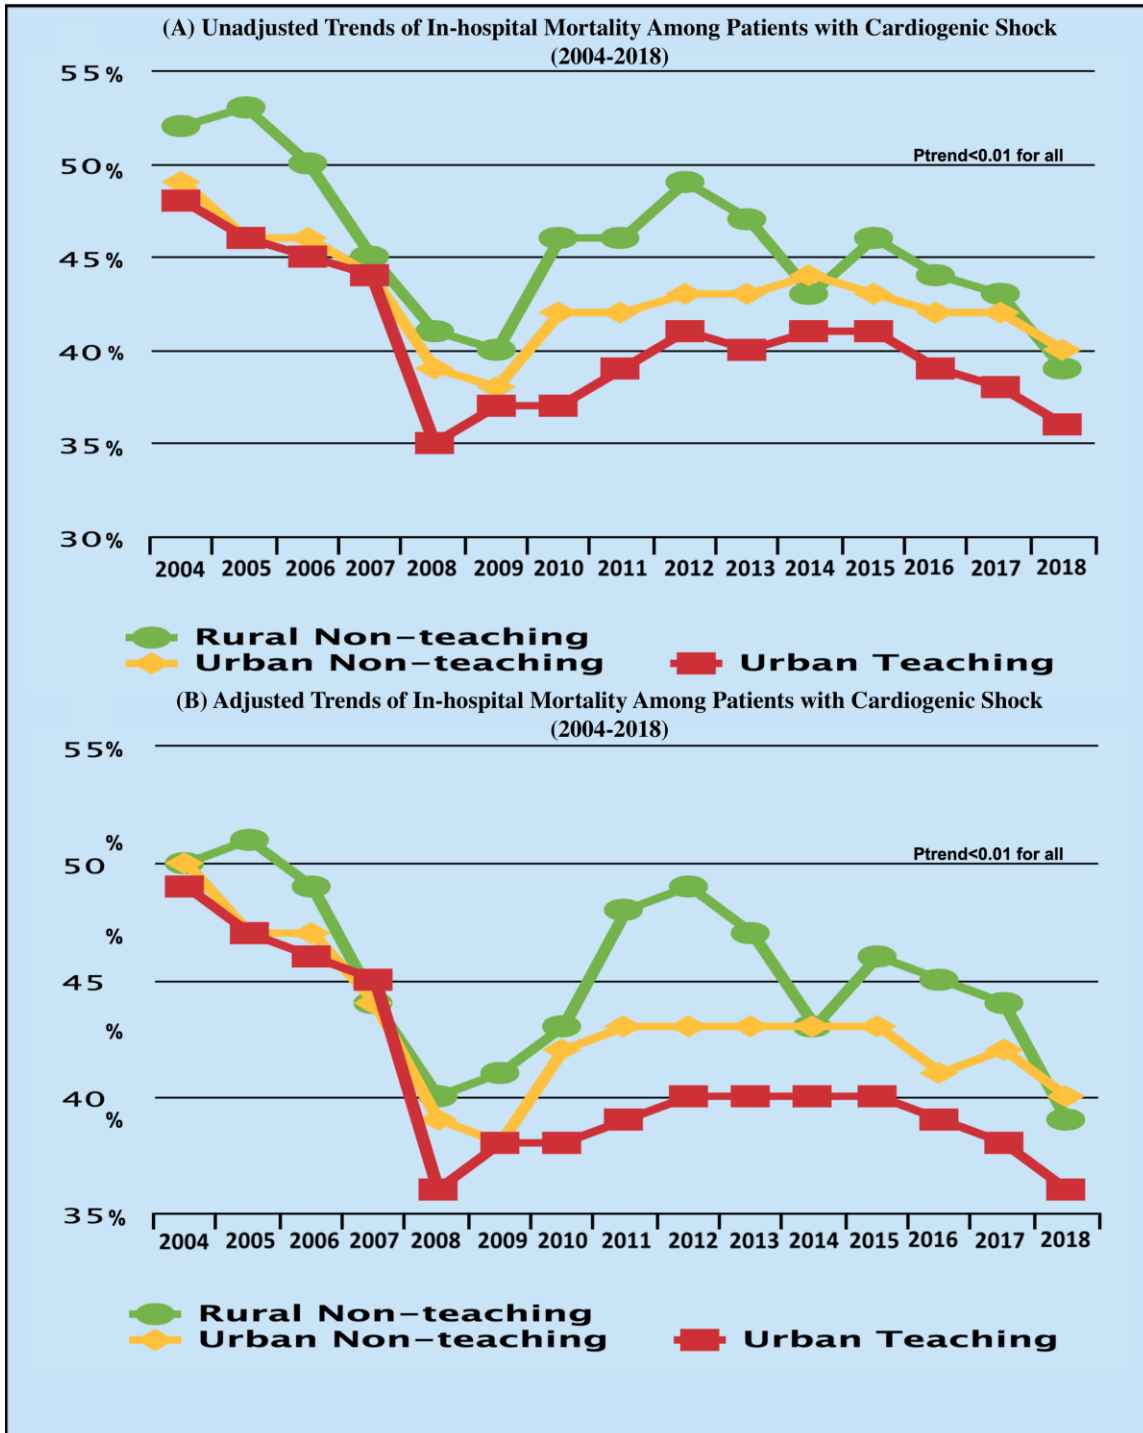

**Figure S3. Trend in in-hospital mortality during the study period stratified by utilization of mechanical circulatory support.**

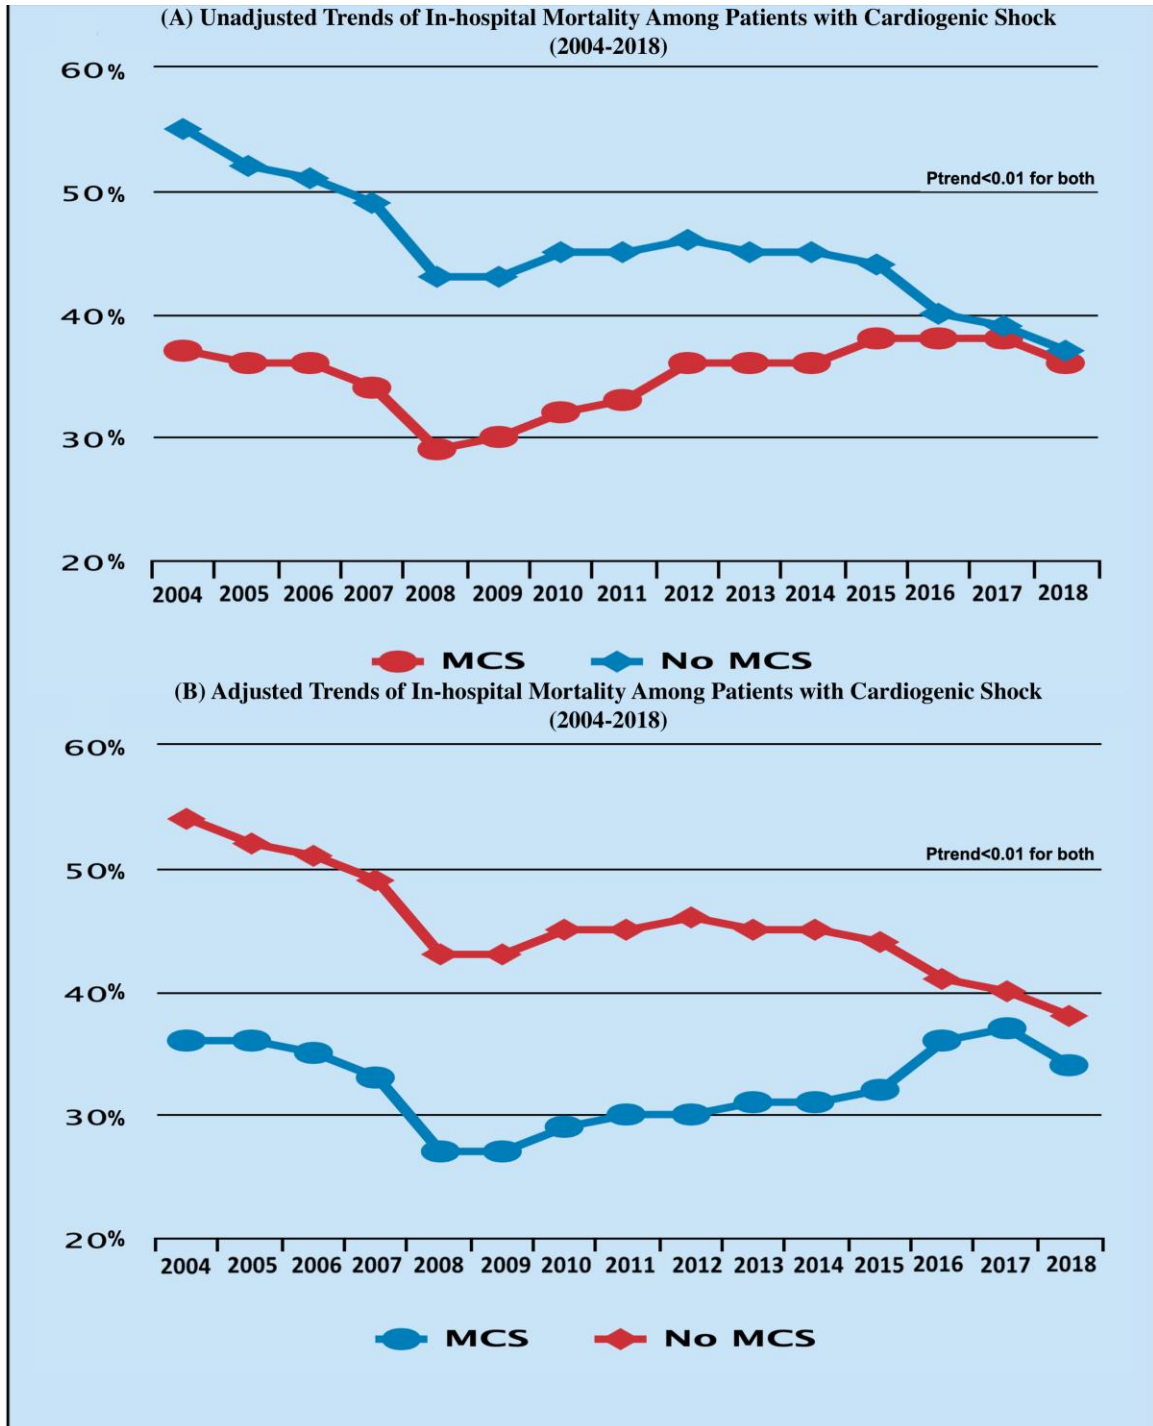

MCS; Mechanic circulatory support devices

**Figure S4. Trend in in-hospital mortality during the study period among patients with AMI-CS stratified by revascularization status.**

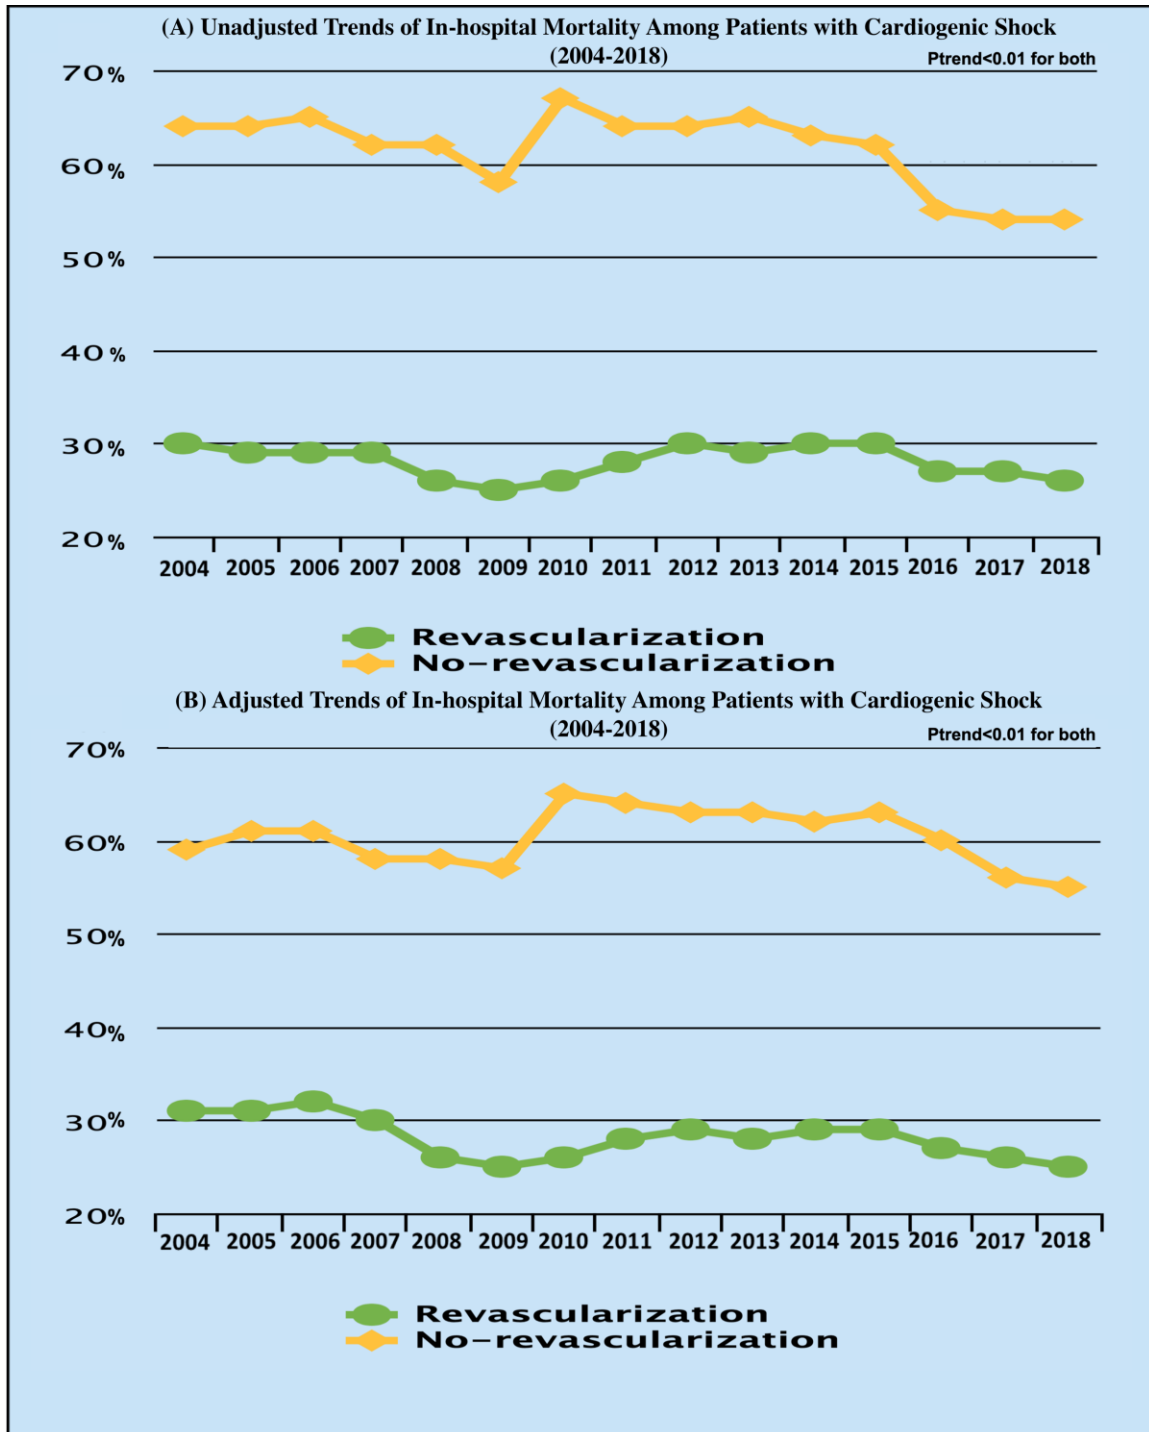

AMI-CS; Acute myocardial infarction related cardiogenic shock
